# Supplementary material for: Direct-liquid-evaporation chemical vapor deposition of smooth, highly conformal cobalt and cobalt nitride thin films
Source: Royal Society of Chemistry journal article supplement (doi:10.1039/c5tc03221k), 2015-01-01

Electronic Supplementary Information (ESI)

Direct-Liquid-Evaporation Chemical Vapor Deposition of Smooth, Highly Conformal Cobalt and Cobalt Nitride Thin Films

Jing Yang, Kecheng Li, Jun Feng and Roy G. Gordon

Harvard University, Cambridge, MA, 02138 USA

Contents

|                                                                                                                                                                                                                                                         |        |
|---------------------------------------------------------------------------------------------------------------------------------------------------------------------------------------------------------------------------------------------------------|--------|
| Figure S1. Electron Diffraction (ED) image of DLE-CVD Co deposited with 50 sccm NH <sub>3</sub> and 150 sccm H <sub>2</sub> on a silicon nitride membrane                                                                                               | Page 2 |
| Tables S1 through S5. Comparison of Previously Reported and Measured Electron Diffraction Peak Positions of DLE-CVD CoN <sub>x</sub> deposited with various amounts of NH <sub>3</sub> and H <sub>2</sub> as co-reactants on silicon nitride membranes. |        |
| Table S1. Co deposited with 20 sccm NH <sub>3</sub> and 180 sccm H <sub>2</sub>                                                                                                                                                                         | Page 3 |
| Table S2. Co deposited with 50 sccm NH <sub>3</sub> and 150 sccm H <sub>2</sub>                                                                                                                                                                         | Page 3 |
| Table S3. Co deposited with 100 sccm NH <sub>3</sub> and 100 sccm H <sub>2</sub>                                                                                                                                                                        | Page 4 |
| Table S4. Co deposited with 50 sccm NH <sub>3</sub> and 150 sccm H <sub>2</sub>                                                                                                                                                                         | Page 4 |
| Table S5. Co <sub>3</sub> N deposited with 200 sccm NH <sub>3</sub>                                                                                                                                                                                     | Page 5 |
| Figure S2. Arrhenius plot showing the natural logarithm of the DLE-CVD Co deposition rate at temperatures from 200 to 240°C versus the reciprocal of the temperature.                                                                                   | Page 6 |
| Figure S3. (a) The deposition rate and (b) the sheet resistance of DLE-CVD Co films as a function of the delivery rate of cobalt precursor solution                                                                                                     | Page 7 |
| Figure S4. (a) XRR experimental curve and (b) fitted simulation line for a DLE-CVD Co film deposited on thermal oxide, from which the thickness is calculated to be 23 nm.                                                                              | Page 7 |
| Figure S5. Schematic diagram of the DLE-CVD system                                                                                                                                                                                                      | Page 8 |
| Figure S6. Cobalt film growth rate as a function of the cobalt precursor partial pressure for calculating the step coverage (SC)                                                                                                                        | Page 9 |

Figure S1. Electron Diffraction (ED) image of DLE-CVD Co deposited with 50 sccm  $\text{NH}_3$  and 150 sccm  $\text{H}_2$  on a silicon nitride membrane.

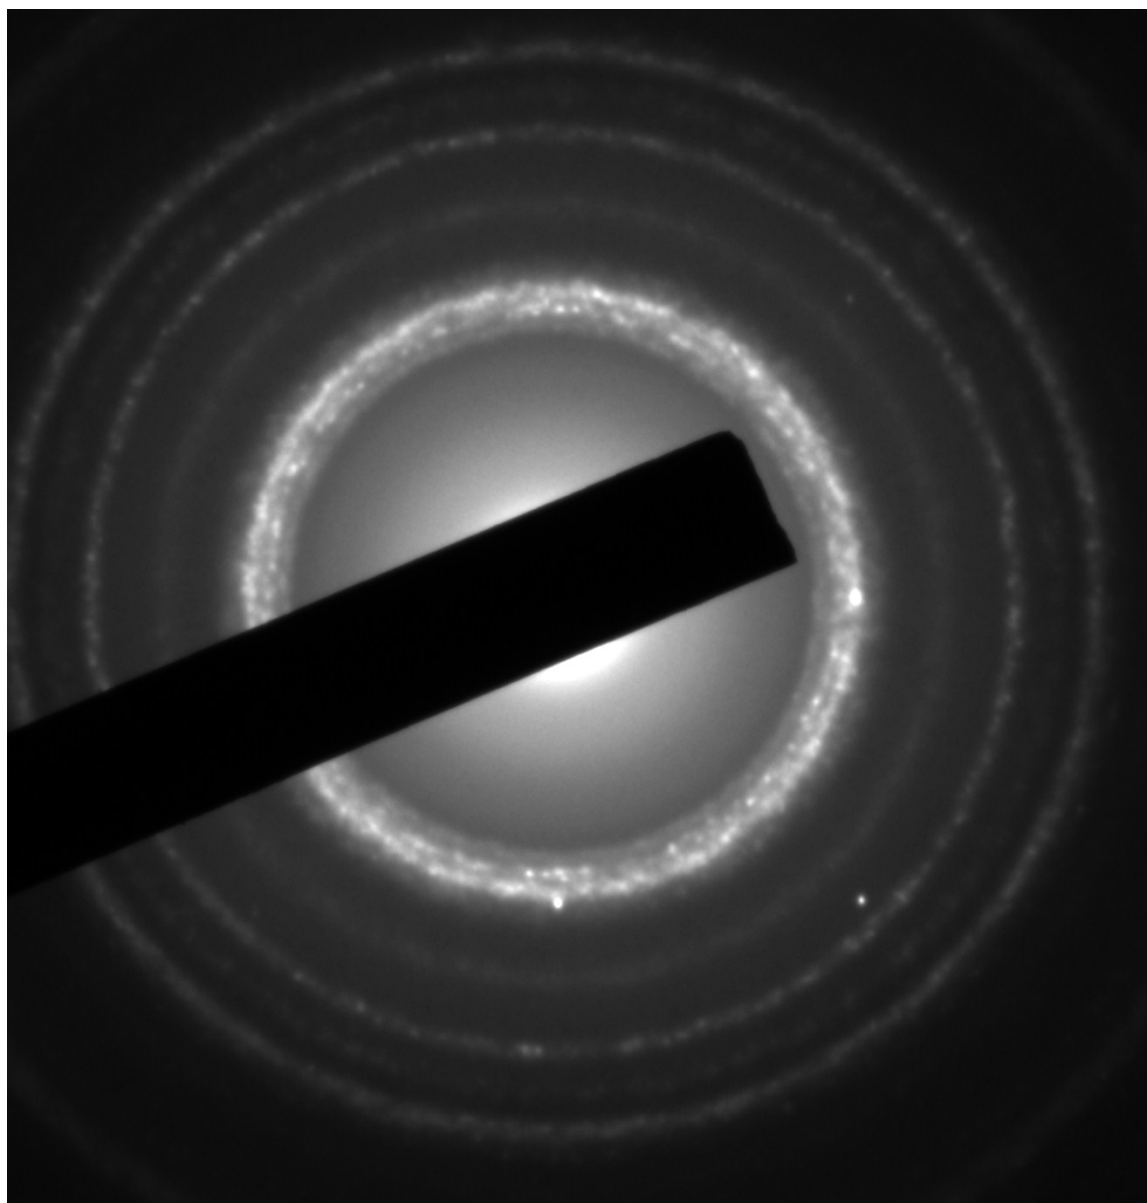

Table S1. ED results for a DLE-CVD Co film deposited on a TEM grid formed by a SiN<sub>x</sub> membrane (50 nm thick) suspended across a hole in a silicon substrate. The film was deposited using a mixture of 20 sccm NH<sub>3</sub> and 180 sccm H<sub>2</sub> gases as co-reactants. The rings belong to the cubic Co phase, and the discrete spots came from the Si substrate, which was used for internal calibration.

| No. | fcc β-Co |                    |                  | measured d (Å) | error (%) |
|-----|----------|--------------------|------------------|----------------|-----------|
|     | hkl      | d (Å) <sup>a</sup> | Int <sup>a</sup> |                |           |
| 1   | 111      | 2.05               | 100              | 2.04           | -0.5      |
| 2   | 200      | 1.77               | 40               | 1.78           | 0.6       |
| 3   | 220      | 1.25               | 25               | 1.26           | 0.8       |
| 4   | 311      | 1.07               | 30               | 1.08           | 0.9       |

<sup>a</sup>The indices of planes (hkl), interplanar spacings (d), and intensities (Int) shown in this table represent the reference crystal structures of fcc β-Co (PDF Card No.15-0806).

Table S2. ED results for DLE-CVD CoN<sub>x</sub> film using a mixture of 50 sccm NH<sub>3</sub> and 150 sccm H<sub>2</sub> as co-reactants. The rings belong to a mixture of cubic and hexagonal Co phase, with major diffraction peaks corresponding to cubic Co phase.

| No. | fcc β-Co |                    |                  | hcp α-Co |                    |                  | measured d (Å) | error (%) <sup>b</sup> |
|-----|----------|--------------------|------------------|----------|--------------------|------------------|----------------|------------------------|
|     | hkl      | d (Å) <sup>a</sup> | Int <sup>a</sup> | hkl      | d (Å) <sup>a</sup> | Int <sup>a</sup> |                |                        |
| 1   |          |                    |                  | 100      | 2.17               | 27               | 2.15           | -0.9                   |
| 2   | 111      | 2.05               | 100              | 2        | 2.03               | 28               | 2.05           | 0.0                    |
| 3   |          |                    |                  | 101      | 1.92               | 100              | 1.91           | -0.5                   |
| 4   | 200      | 1.77               | 40               |          |                    |                  | 1.77           | 0.0                    |
| 5   | 220      | 1.25               | 25               |          |                    |                  | 1.26           | 0.8                    |
| 6   | 311      | 1.07               | 30               |          |                    |                  | 1.07           | 0.0                    |
| 7   | 222      | 1.02               | 12               |          |                    |                  | 1.02           | 0.0                    |

<sup>a</sup> For Tables S2 through S4, the indices of planes (hkl), interplanar spacings (d), and intensities (Int) represent the reference crystal structures of fcc β-Co (PDF Card No.15-0806), hcp α-Co (PDF Card No. 71-4239).

<sup>b</sup> For Tables S2 through S4, error means the difference between measured value and the closest reference value, expressed as a percentage.

Table S3. ED Results for a DLE-CVD Co film made using a mixture of 100 sccm NH<sub>3</sub> and 100 sccm H<sub>2</sub> as co-reactants. The rings belong to a mixture of cubic and hexagonal Co phase, with major diffraction peaks corresponding to cubic Co phase.

| No. | fcc $\beta$ -Co |                    |                  | hcp $\alpha$ -Co |                    |                  | Measured<br>d (Å) | error (%) <sup>b</sup> |
|-----|-----------------|--------------------|------------------|------------------|--------------------|------------------|-------------------|------------------------|
|     | hkl             | d (Å) <sup>a</sup> | Int <sup>a</sup> | hkl              | d (Å) <sup>a</sup> | Int <sup>a</sup> |                   |                        |
| 1   |                 |                    |                  | 100              | 2.17               | 27               | 2.18              | 0.5                    |
| 2   | 111             | 2.05               | 100              | 002              | 2.03               | 28               | 2.06              | 0.5                    |
| 3   |                 |                    |                  | 101              | 1.92               | 100              | 1.92              | 0                      |
| 4   | 200             | 1.77               | 40               |                  |                    |                  | 1.79              | 1.1                    |
| 5   |                 |                    |                  | 102              | 1.48               | 11               | 1.49              | 0.7                    |
| 6   | 220             | 1.25               | 25               |                  |                    |                  | 1.26              | 0.8                    |
| 7   | 311             | 1.07               | 30               |                  |                    |                  | 1.07              | 0                      |

Table S4. ED results for a DLE-CVD Co film made using a mixture of 150 sccm NH<sub>3</sub> and 50 sccm H<sub>2</sub> as co-reactants. The rings belong to a mixture of cubic and hexagonal Co phase, with major diffraction peaks corresponding to cubic Co phase.

| No. | fcc $\beta$ -Co |                    |                  | hcp $\alpha$ -Co |       |     | Measured<br>d (Å) | error (%) <sup>b</sup> |
|-----|-----------------|--------------------|------------------|------------------|-------|-----|-------------------|------------------------|
|     | hkl             | d (Å) <sup>a</sup> | Int <sup>a</sup> | hkl              | d (Å) | Int |                   |                        |
| 1   |                 |                    |                  | 100              | 2.17  | 27  | 2.18              | 0.5                    |
| 2   | 111             | 2.05               | 100              | 2                | 2.03  | 28  | 2.05              | 0.0                    |
| 3   |                 |                    |                  | 101              | 1.92  | 100 | 1.91              | -0.5                   |
| 4   | 200             | 1.77               | 40               |                  |       |     | 1.79              | 1.1                    |
| 5   |                 |                    |                  | 102              | 1.48  | 11  | 1.49              | 0.4                    |
| 6   | 220             | 1.25               | 25               | 110              | 1.25  | 10  | 1.26              | 0.8                    |
| 7   |                 |                    |                  | 103              | 1.15  | 10  | 1.15              | 0.0                    |
| 8   | 311             | 1.07               | 30               |                  |       |     | 1.07              | 0.0                    |

Table S5. ED results for a DLE-CVD Co<sub>3</sub>N film made using 200 sccm NH<sub>3</sub> as the only co-reactant.

| No. | hcp Co <sub>3</sub> N |                    |                  | measured d (Å) | Error (%) |
|-----|-----------------------|--------------------|------------------|----------------|-----------|
|     | hkl                   | d (Å) <sup>a</sup> | Int <sup>a</sup> |                |           |
| 1   | 100                   | 2.31               | 20               | 2.32           | 0.4       |
| 2   | 002                   | 2.17               | 50               | 2.19           | 0.9       |
| 3   | 101                   | 2.04               | 100              | 2.06           | 1.0       |
| 4   | 102                   | 1.59               | 50               | 1.59           | 0         |
| 5   | 110                   | 1.33               | 50               | 1.35           | 1.5       |
| 6   | 103                   | 1.23               | 70               | 1.23           | 0         |
| 7   | 112                   | 1.14               | 50               | 1.14           | 0         |

The rings belong to the hexagonal Co<sub>3</sub>N phase, and the discrete spots came from Si substrate, which was used for internal calibration.

<sup>a</sup>The indices of planes (hkl), interplanar spacings (d), and intensities (Int) shown in this table represent the reference crystal structures of hcp Co<sub>3</sub>N (PDF Card No. 06-0691)

Figure S2. Arrhenius plot showing the natural logarithm of the DLE-CVD Co deposition rate at temperatures from 200 to 240°C versus the reciprocal of the temperature. The cobalt precursor solution (12 wt% of  $\text{Co}(\text{iPr-MeAMD})_2$  in tetradecane) was delivered at a flow rate of 5g/hr along with 100 sccm  $\text{N}_2$  carrier gas, and then vaporized at 180°C before entering the reactor. The deposition was performed on thermal oxide substrates using 100 sccm  $\text{NH}_3$  and 100 sccm  $\text{H}_2$ , at 10 Torr total pressure.

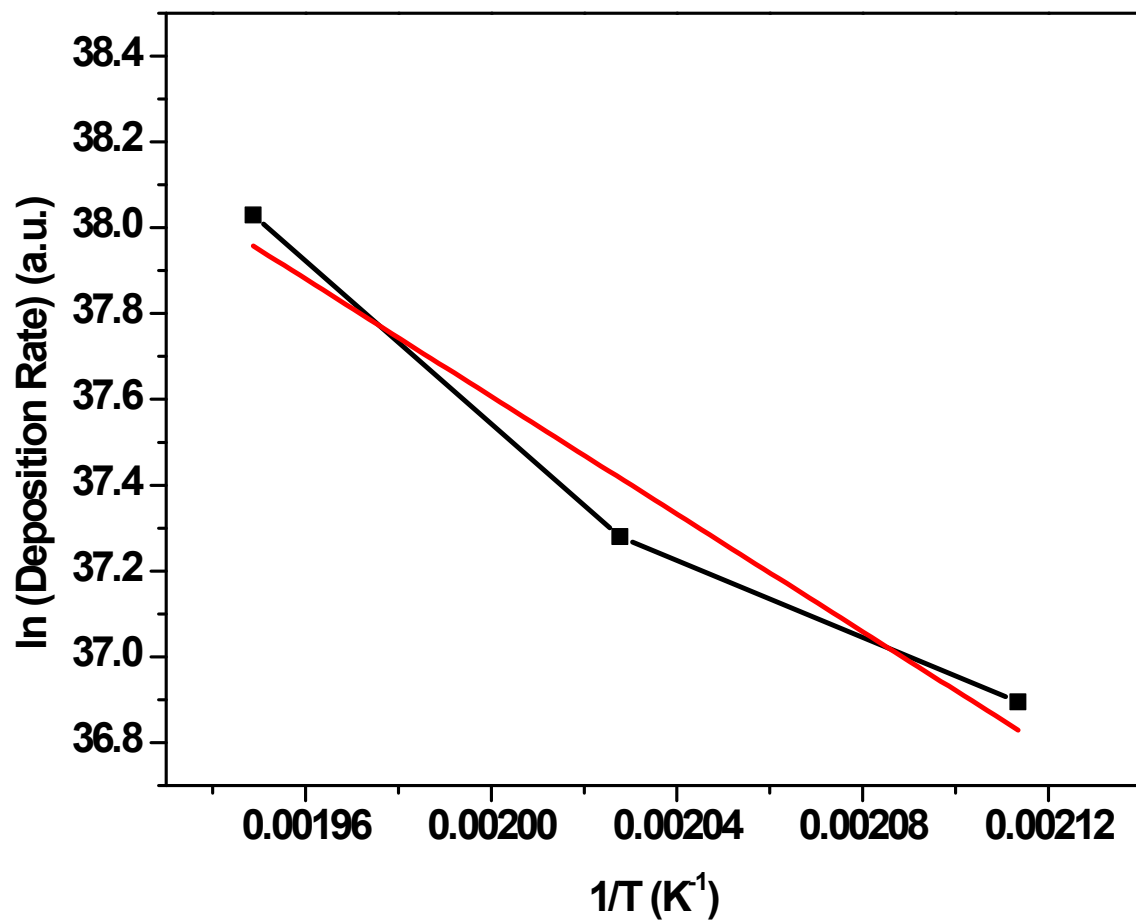

Figure S3. (a) The deposition rate (measured by XRF counts per minute) and (b) the sheet resistance of DLE-CVD Co films as a function of the cobalt precursor solution delivery rate. The cobalt precursor solution (12 wt% of  $\text{Co}(\text{iPr-MeAMD})_2$  in tetradecane) was delivered at flow rates between 5 and 20 g/hr along with 100 sccm  $\text{N}_2$  carrier gas, and vaporized at 180°C before entering the reactor. The deposition was performed on thermal oxide substrates at 200°C using 100 sccm  $\text{NH}_3$  and 100 sccm  $\text{H}_2$ , at 10 Torr.

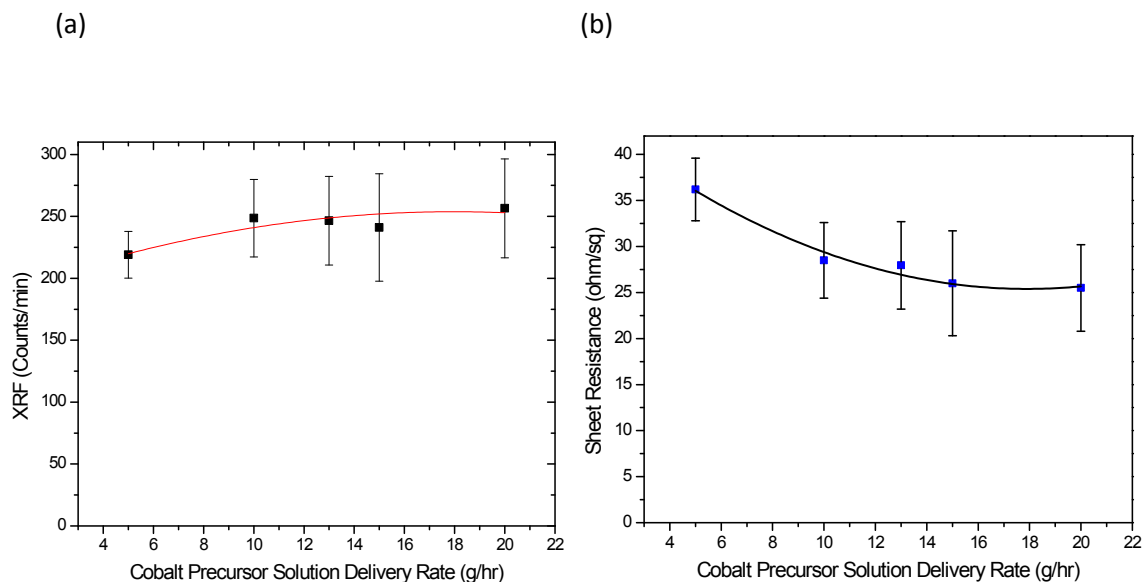

Figure S4. (a) XRR experimental curve and (b) fitted simulation line of a DLE-CVD Co film deposited on thermal oxide; the thickness is calculated to be 23 nm.

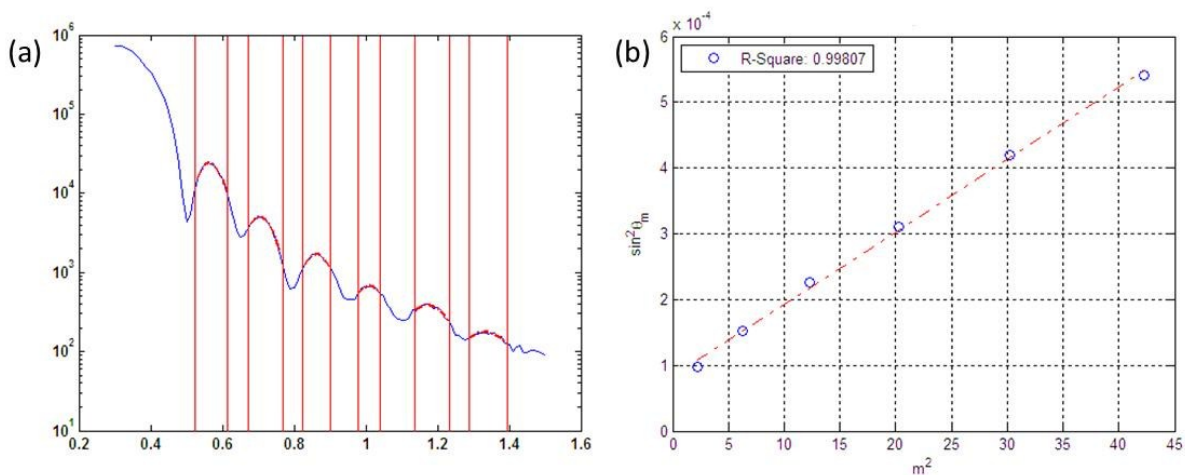

Figure S5. Schematic diagram of the DLE-CVD system

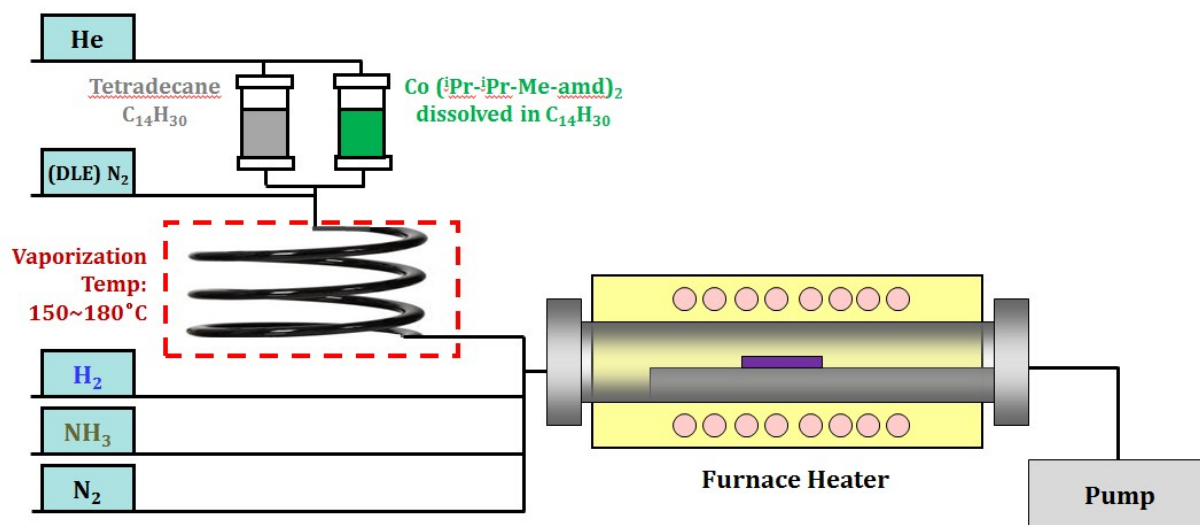



Figure S6. The deposition rate (cobalt film growth rate) as a function of the cobalt precursor partial pressure. The cobalt precursor solution (12 wt% of  $\text{Co}(\text{iPr-MeAMD})_2$  in tetradecane) was delivered at flow rates between 5 and 20 g/hr along with 100 sccm  $\text{N}_2$  carrier gas, and vaporized at 180°C before entering the reactor. The deposition was performed on thermal oxide substrates at 200°C using 100 sccm  $\text{NH}_3$  and 100 sccm  $\text{H}_2$ , at 10 Torr.

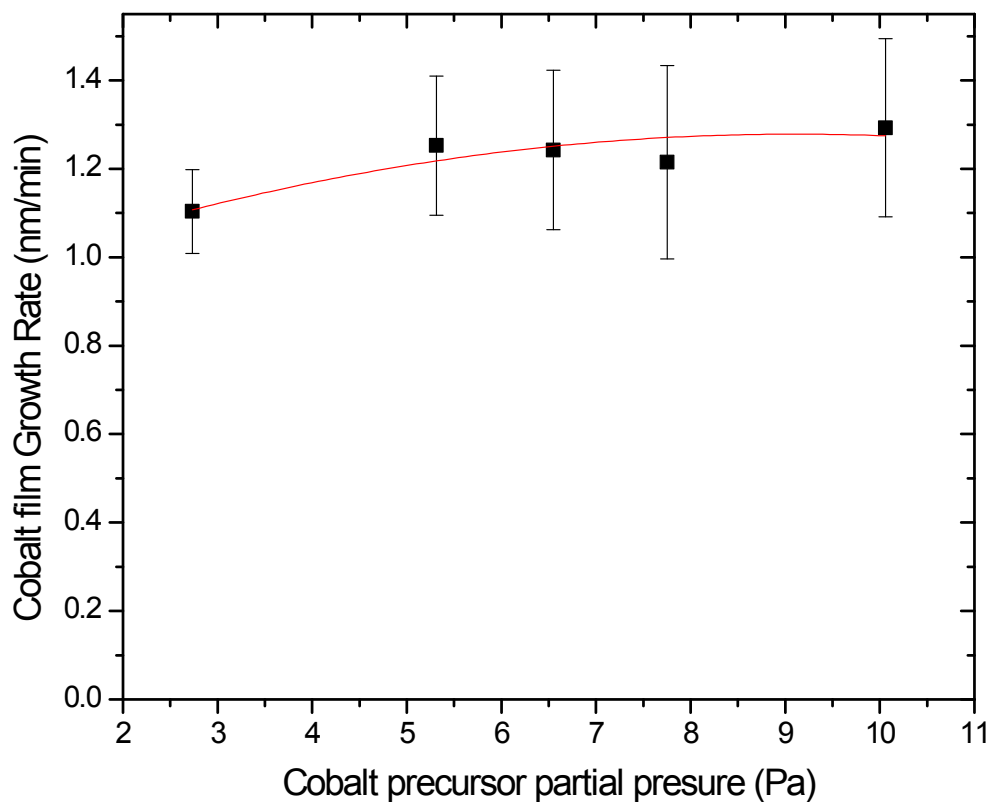

Supplement: c5tc03221k1.pdf [file c5tc03221k1.pdf]
